# Supplementary material for: Fluid-rock interaction in the intraplate active seismic zone: Boon or bane?
Source: Copernicus journal article supplement (doi:10.5194/egusphere-2023-2553), 2024-03-07
Supplement: Supplementary file 1 [file egusphere-2023-2553-supplement.pdf]

1 **Supplementary Materials (Tables)**

2 **Fluid-rock interaction in the intraplate active seismic zone: Boon or bane?**

3 **Piyal Halder<sup>1,2</sup>, Matsyendra Kumar Shukla<sup>3</sup>, Kamlesh Kumar<sup>1,2</sup>, Anupam Sharma<sup>1,2\*</sup>**

4 <sup>1</sup>Birbal Sahni Institute of Palaeosciences (DST, Govt. of India), Lucknow-226007, Uttar Pradesh, India

5 <sup>2</sup>Academy of Scientific and Innovative Research (AcSIR), Ghaziabad- 201002, India

6 <sup>3</sup>Govt. of India, Ministry of Earth Sciences (MoES), Borehole Geophysics Research Laboratory (BGRL), Karad-  
7 415105, India

8 **\*Corresponding author:** Anupam Sharma (anupam110367@gmail.com; anupam.sharma@bsip.res.in)

|                 |                                                                  | Al <sub>2</sub> O <sub>3</sub> | Na <sub>2</sub> O | FeO   | CaO   | MgO   | K <sub>2</sub> O | LOI   | TiO <sub>2</sub> |
|-----------------|------------------------------------------------------------------|--------------------------------|-------------------|-------|-------|-------|------------------|-------|------------------|
|                 | <b>C<sub>0</sub></b><br><b>(KBH1_384-389,</b><br><b>392-394)</b> | 15.12                          | 5.60              | 2.86  | 2.18  | 1.54  | 1.44             | 1.35  | 0.39             |
| <b>KBH1_378</b> | <b>C<sub>a</sub></b>                                             | 21.34                          | 5.56              | 9.24  | 6.06  | 5.15  | 1.31             | 4.96  | 1.46             |
|                 | <b>Slope</b>                                                     | 0.71                           | 1.01              | 0.31  | 0.36  | 0.30  | 1.09             | 0.27  | 0.27             |
|                 | <b>Gain/loss</b>                                                 | 6.22                           | -0.04             | 6.38  | 3.89  | 3.61  | -0.12            | 3.61  | 1.07             |
|                 | <b>Gain/loss relative to C<sub>0</sub></b>                       | 0.41                           | -0.01             | 2.23  | 1.78  | 2.35  | -0.09            | 2.67  | 2.73             |
| <b>KBH1_379</b> | <b>C<sub>a</sub></b>                                             | 16.40                          | 4.03              | 8.08  | 4.47  | 8.83  | 0.58             | 10.08 | 0.90             |
|                 | <b>Slope</b>                                                     | 0.92                           | 1.39              | 0.35  | 0.49  | 0.17  | 2.46             | 0.13  | 0.44             |
|                 | <b>Gain/loss</b>                                                 | 1.28                           | -1.57             | 5.22  | 2.29  | 7.29  | -0.85            | 8.73  | 0.50             |
|                 | <b>Gain/loss relative to C<sub>0</sub></b>                       | 0.08                           | -0.28             | 1.83  | 1.05  | 4.75  | -0.59            | 6.47  | 1.29             |
| <b>KBH1_380</b> | <b>C<sub>a</sub></b>                                             | 13.47                          | 2.38              | 3.77  | 1.15  | 3.94  | 3.19             | 6.08  | 0.32             |
|                 | <b>Slope</b>                                                     | 1.12                           | 2.35              | 0.76  | 1.90  | 0.39  | 0.45             | 0.22  | 1.22             |
|                 | <b>Gain/loss</b>                                                 | -1.65                          | -3.21             | 0.91  | -1.03 | 2.41  | 1.75             | 4.73  | -0.07            |
|                 | <b>Gain/loss relative to C<sub>0</sub></b>                       | -0.11                          | -0.57             | 0.32  | -0.47 | 1.57  | 1.22             | 3.51  | -0.18            |
| <b>KBH1_381</b> | <b>C<sub>a</sub></b>                                             | 15.12                          | 4.25              | 4.05  | 3.74  | 2.05  | 0.55             | 4.47  | 1.18             |
|                 | <b>Slope</b>                                                     | 1.00                           | 1.32              | 0.71  | 0.58  | 0.75  | 2.61             | 0.30  | 0.33             |
|                 | <b>Gain/loss</b>                                                 | 0.00                           | -1.34             | 1.20  | 1.56  | 0.51  | -0.89            | 3.12  | 0.79             |
|                 | <b>Gain/loss relative to C<sub>0</sub></b>                       | 0.00                           | -0.24             | 0.42  | 0.72  | 0.33  | -0.62            | 2.31  | 2.02             |
| <b>KBH1_382</b> | <b>C<sub>a</sub></b>                                             | 14.48                          | 5.47              | 4.53  | 0.43  | 4.70  | 0.19             | 3.99  | 0.88             |
|                 | <b>Slope</b>                                                     | 1.04                           | 1.02              | 0.63  | 5.08  | 0.33  | 7.54             | 0.34  | 0.45             |
|                 | <b>Gain/loss</b>                                                 | -0.64                          | -0.12             | 1.67  | -1.75 | 3.16  | -1.25            | 2.64  | 0.49             |
|                 | <b>Gain/loss relative to C<sub>0</sub></b>                       | -0.04                          | -0.02             | 0.58  | -0.80 | 2.06  | -0.87            | 1.96  | 1.24             |
| <b>KBH1_383</b> | <b>C<sub>a</sub></b>                                             | 14.02                          | 3.59              | 1.25  | 3.19  | 0.58  | 1.19             | 4.05  | 0.15             |
|                 | <b>Slope</b>                                                     | 1.08                           | 1.56              | 2.29  | 0.68  | 2.65  | 1.21             | 0.33  | 2.56             |
|                 | <b>Gain/loss</b>                                                 | -1.09                          | -4.65             | -6.20 | 4.20  | -4.36 | -0.85            | 6.01  | -0.61            |
|                 | <b>Gain/loss relative to C<sub>0</sub></b>                       | -0.07                          | -0.83             | -2.17 | 1.93  | -2.84 | -0.59            | 4.45  | -1.55            |
| <b>KBH1_390</b> | <b>C<sub>a</sub></b>                                             | 16.04                          | 4.00              | 2.11  | 2.10  | 0.48  | 5.30             | 1.12  | 0.22             |
|                 | <b>Slope</b>                                                     | 1.06                           | 0.72              | 0.74  | 0.96  | 0.31  | 3.69             | 0.83  | 0.56             |
|                 | <b>Gain/loss</b>                                                 | 0.91                           | -3.70             | -2.90 | -0.34 | -4.83 | 13.46            | -0.51 | -0.44            |
|                 | <b>Gain/loss relative to C<sub>0</sub></b>                       | 0.06                           | -0.66             | -1.01 | -0.16 | -3.14 | 9.37             | -0.38 | -1.13            |

9 **Table S1.** Mass Balance Calculation of the altered samples with respect to the average composition of the  
10 unaltered samples (C<sub>0</sub>).

|                                    | Scale | C <sub>0</sub> | C <sub>a</sub><br>(KBHI_378) | C <sub>a</sub><br>(KBHI_379) | C <sub>a</sub><br>(KBHI_380) | C <sub>a</sub><br>(KBHI_381) | C <sub>a</sub><br>(KBHI_382) | C <sub>a</sub><br>(KBHI_383) | C <sub>a</sub><br>(KBHI_390) |
|------------------------------------|-------|----------------|------------------------------|------------------------------|------------------------------|------------------------------|------------------------------|------------------------------|------------------------------|
| <b>Al<sub>2</sub>O<sub>3</sub></b> | 0.99  | 15             | 21.17                        | 16.27                        | 13.36                        | 15.00                        | 14.36                        | 13.91                        | 15.91                        |
| <b>Na<sub>2</sub>O</b>             | 2.32  | 13             | 12.92                        | 9.36                         | 5.54                         | 9.88                         | 12.72                        | 8.35                         | 9.30                         |
| <b>FeO</b>                         | 3.85  | 11             | 35.55                        | 31.10                        | 14.52                        | 15.60                        | 17.42                        | 4.80                         | 8.10                         |
| <b>CaO</b>                         | 4.13  | 9              | 25.05                        | 18.48                        | 4.74                         | 15.44                        | 1.77                         | 13.20                        | 8.66                         |
| <b>MgO</b>                         | 4.56  | 7              | 23.47                        | 40.24                        | 17.97                        | 9.33                         | 21.41                        | 2.64                         | 2.17                         |
| <b>K<sub>2</sub>O</b>              | 3.48  | 5              | 4.57                         | 2.03                         | 11.09                        | 1.92                         | 0.66                         | 4.15                         | 18.46                        |
| <b>LOI</b>                         | 2.22  | 3              | 11.02                        | 22.41                        | 13.52                        | 9.94                         | 8.88                         | 9.01                         | 2.49                         |
| <b>TiO<sub>2</sub></b>             | 2.55  | 1              | 3.73                         | 2.29                         | 0.82                         | 3.02                         | 2.24                         | 0.39                         | 0.56                         |

12 **Table S2** Data scaled to even values in decreasing concentrations to avoid congestion in the isocon plots following  
 13 (Grant, 2005)

14 **References:**

15 Grant, J.: Isocon analysis: A brief review of the method and applications, Physics and Chemistry of the Earth,  
 16 Parts A/B/C, 30, 10.1016/j.pce.2004.11.003, 2005.
